# Supplementary material for: Genotypic and phenotypic analysis of clinical isolates of Staphylococcus aureus revealed production patterns and hemolytic potentials unlinked to gene profiles and source
Source: PubMed Central journal article supplement (PMC4736648; doi:10.1186/s12866-016-0630-x), 2016-02-01
Supplement: 12866_2016_630_MOESM1_ESM.pdf [file 12866_2016_630_MOESM1_ESM.pdf]

**Additional file 1: Table S1: Primer Sequences and Annealing Temperatures**

| Targets     | Forward primer             | Reverse primer            | Annealing | Source     |
|-------------|----------------------------|---------------------------|-----------|------------|
| <i>sea</i>  | CAGCATACTATATTGTTTAAAG     | TCTTAATAGTGTATTGAATTCT    | 56°C      | this study |
| <i>seb</i>  | TGCACAAATCGAGTAAATTC       | TCACTTTTCTTTGTCGTAA       | 52°C      | this study |
| <i>sec</i>  | agatttagcaaagaagtacaaagatg | aaggaggactctatcttcacact   | 45°C      | [1]        |
| <i>sed</i>  | TCTGAATTAAGTAGTACCGC       | ATTCGTAATTGTTTTTCGGG      | 53°C      | this study |
| <i>see</i>  | ctgggtcaaaagatgctactaa     | ctattaattcagagaacctcc     | 60°C      | [2]        |
| <i>tst</i>  | TAAAGGATTTGCTAGACTGG       | GGTGGTTTTTCAGTATTGTAT     | 52°C      | this study |
| <i>seg</i>  | GTTGAAGGAAGAGGAGTTAT       | TCAACAACCTTTATTATCTCCG    | 52°C      | this study |
| <i>seh</i>  | TAGCTAATGCATATGGTCAA       | AGATTTTAAAGTTTTATTGTCTTCA | 53°C      | this study |
| <i>sei</i>  | CTATTGCAAATCAACTCGAA       | AAAAACTTACAGGCAGTCC       | 52°C      | this study |
| <i>sej</i>  | ACGAAAAGGGTATCTCTGAA       | ACAGAACCAAAGGTAGACTT      | 54°C      | this study |
| <i>selk</i> | AGGAATTGATAATCTCAGGA       | CCAAATGGAATTTCTCAGAC      | 52°C      | this study |
| <i>sell</i> | AAAATTCACCAGAATCACAC       | TTAAGAAGCTTTCTGGAAGA      | 52°C      | this study |
| <i>selm</i> | GATAATTCGACAGTAACAGC       | CGACAGTTTTGTTGTCATTA      | 52°C      | this study |
| <i>seln</i> | TACTGATATAACGTGGCAAT       | AGATGAGCTAACTGTTCTATT     | 52°C      | this study |
| <i>selo</i> | TTGTGTAAGAAGTCAAGTGT       | GATAGTCTGATGAATCTATTGTT   | 53°C      | this study |
| <i>selp</i> | GACCTTGGTTCAAAGACACC       | TGTCTTGACTGAAGGTCTAGC     | 52°C      | this study |
| <i>selq</i> | AAAAGCTTCAAGGAGTTAGT       | ATCCAATGAAAATTCTCTGC      | 53°C      | this study |
| <i>selr</i> | agcggtaatagcagaaaatg       | tctgtaccgtaaccgtttt       | 55°C      | [3]        |
| <i>sels</i> | TGAATTAGATTC AACCGCAC      | CGTCTATGTGTAATTTGAAGAG    | 54°C      | this study |
| <i>selt</i> | CGAATCAATACATTAGACGA       | TTGTGTAATCAAGTGTAAAGT     | 51°C      | this study |
| <i>selu</i> | aatggctctaaaattgatgg       | atttgattccatcatgctc       | 55°C      | [3]        |
| <i>selw</i> | ATTTTTACAAATTCAGCGAGT      | TAACACCACCATAACTACAT      | 52°C      | this study |
| <i>selx</i> | TTACGATAGATACAGCAAGG       | TGTCATTAACACTTTTCACAA     | 52°C      | this study |
| <i>hla</i>  | ACTACAGATATTGGAAGCAA       | TTTCTTCTTTTTCCCAATCG      | 52°C      | this study |
| <i>h1b</i>  | AAGCCGAATCTAAGAAAGAT       | TTTCAGTCACAACCTCATTG      | 52°C      | this study |
| <i>h1g1</i> | GGTAAAATAACACCAGTCAG       | TTGTGATTTTCCCAATCAAT      | 52°C      | this study |
| <i>h1g2</i> | CATCAAAAAGAACAAGACA        | TTACTTAGGTGTGATGCTTT      | 52°C      | this study |
| <i>spa</i>  | agacgatcctcggtgagc         | gctttgcaatgcttactg        | 50°C      | [4]        |

## References

1. Couch JL, Soltis MT, Betley MJ: Cloning and nucleotide sequence of the type E staphylococcal enterotoxin gene. *J Bacteriol* 1988, 170:2954–2960.
2. Sergeev N, Volokhov D, Chizhikov V, Rasooly A: Simultaneous Analysis of Multiple Staphylococcal Enterotoxin Genes by an Oligonucleotide Microarray Assay. *J Clin Microbiol* 2004, 42:2134–2143.
3. Varshney AK, Mediavilla JR, Robiou N, Guh A, Wang X, Gialanella P, Levi MH, Kreiswirth BN, Fries BC: Diverse enterotoxin gene profiles among clonal complexes of *Staphylococcus aureus* isolates from the Bronx, New York. *Appl Environ Microbiol* 2009, 75:6839–6849.
4. Frénay HM, Bunschoten AE, Schouls LM, van Leeuwen WJ, Vandenbroucke-Grauls CM, Verhoef J, Mooi FR: Molecular typing of methicillin-resistant *Staphylococcus aureus* on the basis of protein A gene polymorphism. *Eur J Clin Microbiol Infect Dis Off Publ Eur Soc Clin Microbiol* 1996, 15:60–64.
