# Supplementary material for: Genotypic and phenotypic analysis of clinical isolates of Staphylococcus aureus revealed production patterns and hemolytic potentials unlinked to gene profiles and source
Source: PubMed Central journal article supplement (PMC4736648; doi:10.1186/s12866-016-0630-x), 2016-02-01
Supplement: 12866_2016_630_MOESM2_ESM.pdf [file 12866_2016_630_MOESM2_ESM.pdf]

**Additional file 2: Table S2. Genomic Setup of Superantigens and Cytolysins of 51 clinical isolates.**

| Isolates  | Superantigens |   |   |   |   |    |   |   |   |   |   |   |   |   |   |   |   |   |   |   | Cytolysins |   |   |   |   |   |    |    |
|-----------|---------------|---|---|---|---|----|---|---|---|---|---|---|---|---|---|---|---|---|---|---|------------|---|---|---|---|---|----|----|
|           | a             | b | c | d | e | ts | g | h | i | j | k | l | m | n | o | p | q | r | s | t | u          | v | w | x | α | β | γ1 | γ2 |
| 771N-10   |               |   |   |   |   |    |   |   |   |   |   |   |   |   |   |   |   |   |   |   |            |   |   | # |   | ° |    |    |
| B3276     |               |   |   |   |   |    |   |   |   |   |   |   |   |   |   |   |   |   |   |   |            |   |   |   | # |   |    |    |
| B3478     |               |   |   |   |   |    |   |   |   |   |   |   |   |   |   |   |   |   |   |   |            |   |   |   | # |   | °  |    |
| Rv52743   |               |   |   |   |   |    |   |   |   |   |   |   |   |   |   |   |   |   |   |   |            |   |   |   | # |   | °  |    |
| B 5990    |               |   |   |   |   |    |   |   |   |   |   |   |   |   |   |   |   |   |   |   |            |   |   |   | # |   | °  |    |
| B7715     |               |   |   |   |   |    |   |   |   |   |   |   |   |   |   |   |   |   |   |   |            |   |   |   | # |   |    |    |
| B7761     |               |   |   |   |   |    |   |   |   |   |   |   |   |   |   |   |   |   |   |   |            |   |   |   | # |   | °  |    |
| Rv53944   |               |   |   |   |   |    |   |   |   |   |   |   |   |   |   |   |   |   |   |   |            |   |   |   | # |   |    |    |
| Rv54192   |               |   |   |   |   |    |   |   |   |   |   |   |   |   |   |   |   |   |   |   |            |   |   |   | # |   | °  |    |
| Rv54213   |               |   |   |   |   |    |   |   |   |   |   |   |   |   |   |   |   |   |   |   |            |   |   |   | # |   |    |    |
| B50188    |               |   |   |   |   |    |   |   |   |   |   |   |   |   |   |   |   |   |   |   |            |   |   |   | # |   | °  |    |
| B3427     |               |   |   |   |   |    |   |   |   |   |   |   |   |   |   |   |   |   |   |   |            |   |   |   | # | " | °  |    |
| 876N-10   |               |   |   |   |   |    |   |   |   |   |   |   |   |   |   |   |   |   |   |   |            |   |   |   | # | " | °  |    |
| Rv51398   |               |   |   |   |   |    |   |   |   |   |   |   |   |   |   |   |   |   |   |   |            |   |   |   | # | " | °  |    |
| Rv52832   |               |   |   |   |   |    |   |   |   |   |   |   |   |   |   |   |   |   |   |   |            |   |   | ^ | # | " | °  |    |
| B1721     |               |   |   |   |   |    |   |   |   |   |   |   |   |   |   |   |   |   |   |   |            |   |   |   | # | " | °  |    |
| B958      |               |   |   |   |   |    |   |   |   |   |   |   |   |   |   |   |   |   |   |   |            |   |   | ^ | # |   | °  |    |
| Rv54054   |               |   |   |   |   |    |   |   |   |   |   |   |   |   |   |   |   |   |   |   |            |   |   |   | # |   | *  | °  |
| B11019    |               |   |   |   |   |    |   |   |   |   |   |   |   |   |   |   |   |   |   |   |            |   |   |   | # |   | *  | °  |
| B2284     |               |   |   |   |   |    |   |   |   |   |   |   |   |   |   |   |   |   |   |   |            |   |   |   | # |   | °  |    |
| 840N-10   |               |   |   |   |   |    |   |   |   |   |   |   |   |   |   |   |   |   |   |   |            |   |   |   | # |   | *  | °  |
| B34571    |               |   |   |   |   |    |   |   |   |   |   |   |   |   |   |   |   |   |   |   |            |   |   |   | # |   | *  | °  |
| Rv52959   |               |   |   |   |   |    |   |   |   |   |   |   |   |   |   |   |   |   |   |   |            |   |   |   | # |   | *  | °  |
| B1793     |               |   |   |   |   |    |   |   |   |   |   |   |   |   |   |   |   |   |   |   |            |   |   |   | # |   | *  | °  |
| B1848     |               |   |   |   |   |    |   |   |   |   |   |   |   |   |   |   |   |   |   |   |            |   |   |   | # |   | *  | °  |
| 638N-10   |               |   |   |   |   |    |   |   |   |   |   |   |   |   |   |   |   |   |   |   |            |   |   |   | # |   | °  |    |
| Rv51379   |               |   |   |   |   |    |   |   |   |   |   |   |   |   |   |   |   |   |   |   |            |   |   |   | # |   | °  |    |
| 767N-10   |               |   |   |   |   |    |   |   |   |   |   |   |   |   |   |   |   |   |   |   |            |   |   |   | # |   | °  |    |
| B3155     |               |   |   |   |   |    |   |   |   |   |   |   |   |   |   |   |   |   |   |   |            |   |   |   | # |   | °  |    |
| Rv52745   |               |   |   |   |   |    |   |   |   |   |   |   |   |   |   |   |   |   |   |   |            |   |   |   | # |   | °  |    |
| Rv54009   |               |   |   |   |   |    |   |   |   |   |   |   |   |   |   |   |   |   |   |   |            |   |   |   | # |   | °  |    |
| Rv54010   |               |   |   |   |   |    |   |   |   |   |   |   |   |   |   |   |   |   |   |   |            |   |   |   | # |   | °  |    |
| B3597     |               |   |   |   |   |    |   |   |   |   |   |   |   |   |   |   |   |   |   |   |            |   |   |   | # |   | °  |    |
| B24743    |               |   |   |   |   |    |   |   |   |   |   |   |   |   |   |   |   |   |   |   |            |   |   |   | # |   | °  |    |
| B69108    |               |   |   |   |   |    |   |   |   |   |   |   |   |   |   |   |   |   |   |   |            |   |   |   | # |   | °  |    |
| 869N-10   |               |   |   |   |   |    |   |   |   |   |   |   |   |   |   |   |   |   |   |   |            |   |   |   | # |   | °  |    |
| Rv54209   |               |   |   |   |   |    |   |   |   |   |   |   |   |   |   |   |   |   |   |   |            |   |   |   | # |   |    |    |
| Rv53955   |               |   |   |   |   |    |   |   |   |   |   |   |   |   |   |   |   |   |   |   |            |   |   |   | # |   | °  |    |
| Rv54216   |               |   |   |   |   |    |   |   |   |   |   |   |   |   |   |   |   |   |   |   |            |   |   |   | # |   | °  |    |
| 784N-10   |               |   |   |   |   |    |   |   |   |   |   |   |   |   |   |   |   |   |   |   |            |   |   |   | # | " | °  |    |
| Rv51334   |               |   |   |   |   |    |   |   |   |   |   |   |   |   |   |   |   |   |   |   |            |   |   |   | # |   | °  |    |
| Rv51410   |               |   |   |   |   |    |   |   |   |   |   |   |   |   |   |   |   |   |   |   |            |   |   |   | # |   | *  | °  |
| Rv51412   |               |   |   |   |   |    |   |   |   |   |   |   |   |   |   |   |   |   |   |   |            |   |   |   | # |   | *  | °  |
| Rv52825I  |               |   |   |   |   |    |   |   |   |   |   |   |   |   |   |   |   |   |   |   |            |   |   |   | # |   | 1  | °  |
| Rv52825II |               |   |   |   |   |    |   |   |   |   |   |   |   |   |   |   |   |   |   |   |            |   |   |   | # | " | °  |    |
| B7709     |               |   |   |   |   |    |   |   |   |   |   |   |   |   |   |   |   |   |   |   |            |   |   |   | # |   | °  |    |
| B8186     |               |   |   |   |   |    |   |   |   |   |   |   |   |   |   |   |   |   |   |   |            |   |   |   | # | " | °  |    |
| Rv54035   |               |   |   |   |   |    |   |   |   |   |   |   |   |   |   |   |   |   |   |   |            |   |   |   | # |   |    |    |
| B16586    |               |   |   |   |   |    |   |   |   |   |   |   |   |   |   |   |   |   |   |   |            |   |   |   | # |   | *  | °  |
| B1455     |               |   |   |   |   |    |   |   |   |   |   |   |   |   |   |   |   |   |   |   |            |   |   |   | # |   | °  |    |
| 803N-10   |               |   |   |   |   |    |   |   |   |   |   |   |   |   |   |   |   |   |   |   |            |   |   |   | # |   |    |    |

superantigens = red; egc superantigens = orange; selw and selx = ocher; cytolytic toxins = green

^ = selu2

# = pseudogene

" = 1bp deletion

\* = nonsense mutation

<sup>1</sup> = altered C-terminus

° = phage disruption
